1 **Varying trypsin inhibitor activity in differently processed soybean expellers linearly**  
2 **reduces prececal amino acid digestibility in broilers**

3  
4 S. Kuenz<sup>a</sup>, S. Thurner<sup>b</sup>, D. Hoffmann<sup>a,b</sup>, K. Kraft<sup>b,c</sup>, M. Wiltafsky-Martin<sup>d</sup>, K. Damme<sup>c</sup>, W.  
5 Windisch<sup>a</sup>, D. Brugger<sup>e\*</sup>  
6

7 <sup>a</sup>Technical University of Munich (TUM), TUM School of Life Sciences,

8 Chair of Animal Nutrition, Liesel-Beckmann-Str. 2, 85354 Freising, Germany

9 <sup>b</sup>Bavarian State Research Center for Agriculture, Institute for Agricultural Engineering and  
10 Animal Husbandry, Voettinger Str. 36, 85354 Freising, Germany

11 <sup>c</sup>Bavarian State Research Center for Agriculture, Department for Education and Poultry  
12 Research, Mainbernhaimer Str. 101, 97318 Kitzingen, Germany

13 <sup>d</sup>Evonik Operations GmbH, Rodenbacher Chaussee 4, 63457 Hanau-Wolfgang, Germany

14 <sup>e</sup>University of Zurich, Vetsuisse-Faculty, Institute of Animal Nutrition, Winterthurerstrasse  
15 270, 8057 Zürich, Switzerland  
16  
17  
18  
19

20 *Abbreviations:* AA, amino acid; BBI, Bowman-Birk trypsin inhibitors; CCK, Cholecystokinin; CP,  
21 crude protein; DC, apparent prececal digestibility coefficient; ESBM, expeller extracted soybean meal;  
22 FCR, feed conversion ratio; KOH, potassium hydroxide; KTI, Kunitz trypsin inhibitors; LW, live  
23 weight; SEAA, sum of essential amino acids; SNEAA, sum of non-essential amino acids; TFI, total feed  
24 intake; TI, trypsin inhibitor, TIA, trypsin inhibitor activity; TiO<sub>2</sub>, titanium dioxide; TWG, total weight  
25 gain  
26

27 \* Corresponding author: Daniel Brugger, phone: +41446358827, e-mail: [dbrugger@nutrivet.uzh.ch](mailto:dbrugger@nutrivet.uzh.ch)  
28  
29  
30

31 **Abstract**

32 The present study investigated the effect of varying trypsin inhibitor activity (TIA) in  
33 differently processed soybean expellers on apparent prececal amino acid (AA) digestibility in  
34 male broiler chickens. Two different raw soybean batches were treated using four different  
35 processing techniques (thermal, hydrothermal, pressure, kilning) at varying intensities. In this  
36 way, 45 expeller extracted soybean meal (ESBM) variants were created. The processed soybean  
37 variants were then merged into a basal diet (160 g/kg crude protein (CP)) at two inclusion levels  
38 (15%, 30%) resulting in 91 different diets (1 basal diet plus 90 experimental diets) with TIA  
39 ranging from 0.4 mg/g to 8.5 mg/g. All diets contained 0.5% of titanium dioxide (TiO<sub>2</sub>). During  
40 four experimental runs, a total of 5,460 1-day old male broiler chickens (Ross 308) were fed a  
41 commercial starter diet (CP 215 g/kg, 14 g/kg Lysine, 12.5 MJ ME/kg) ad libitum from day 1  
42 to day 14. Subsequently, birds were allocated to a total of 546 pens with 10 birds per pen and  
43 were fed the 91 experimental diets *ad libitum*. At day 22, birds were sacrificed and digesta of  
44 the terminal ileum was collected for determination of AA digestibility. TIA depressed the  
45 prececal digestibility of every single AA significantly in a straight linear fashion ( $p < 0.001$ ).  
46 cystine and methionine expressed the strongest suppression by TIA with cystine showing the  
47 lowest apparent prececal digestibility measured (4.94% at 23.6 mg/g TIA in raw ESBM).  
48 Correspondingly, live weight (LW) ( $p < 0.001$ ) and total weight gain (TWG) ( $p < 0.001$ )  
49 declined in a linear manner with increasing TIA in feed. The present data demonstrate that TIA  
50 severely depresses digestibility of essential and non-essential AA and thus growth performance  
51 in a straight linear fashion. On the one hand, this questions the usefulness of defined upper  
52 limits of TIA in soy products whereas on the other hand, TIA must be considered when testing  
53 raw components for their feed protein value in vivo.

54

55 Key words: amino acid, broiler, digestibility, soybean, trypsin inhibitor

## 56        **1. Introduction**

57        Soybeans are the most important protein source in livestock feeding. Compared to other plants,  
58        soybeans have high contents of oil and protein and a superior amino acid pattern (Clarke and  
59        Wiseman, 2005). The nutritional value of most plant materials is limited by the presence of  
60        numerous naturally occurring compounds, which interfere with nutrient digestion and  
61        absorption (Clarke and Wiseman, 2000). The most important anti-nutritional substances  
62        occurring in soybeans are trypsin inhibitors (TI), which can be divided into two classes: The  
63        Kunitz trypsin inhibitors (KTI) and the Bowman-Birk trypsin inhibitors (BBI). The KTI consist  
64        of 181 amino acid residues, have a relative molecular weight of 20,100 Da (Koide and Ikenaka,  
65        1973). The reactive site of this inhibitor class is located at residues Arg 63 and Ile 64 and binds  
66        primarily trypsin. The KTI have a low content of cysteine and only two disulfide bonds. The  
67        second class, BBI are rich in cysteine and have seven disulfide bridges, which is the reason for  
68        a very dense three-dimensional structure (Odani and Ikenaka, 1973). In comparison to the KTI,  
69        the BBI are relatively low in molecular weight (approx. 6,000 Da to 10,000 Da) and have two  
70        independent and symmetric binding sites for trypsin and chymotrypsin. The trypsin-reactive  
71        site is located on Lys 16 and Ser 17 and the chymotrypsin-reactive site is positioned on Leu 43  
72        and Ser 44 (Odani and Ikenaka, 1973). Both inhibitor classes form stable enzyme-inhibitor  
73        complexes on a molar 1:1 ratio (Clarke and Wiseman, 2000).

74        Earlier studies have been published showing the negative effect of trypsin inhibitor activity  
75        (TIA) on growth performance of rats (Grant et al., 1995; Gu et al., 2010), chickens (Clarke and  
76        Wiseman, 2007, 2005; Heger et al., 2016), turkeys (Mian and Garlich, 1995) and pigs  
77        (Batterham et al., 1993; Herkelman et al., 1992; Zollitsch et al., 1993). Furthermore, TI causes  
78        pancreas hypertrophy and hyperplasia in rats (Abbey et al., 1979; Grant et al., 1995) and  
79        chickens (Gertler et al., 1967; Hoffmann et al., 2019; Pacheco et al., 2014; Perilla et al., 1997).  
80        In response to the inhibition of digestive processes, the pancreas increases its size and number

81 of acinar cells in order to elevate the secretion of digestive enzymes (Nitsan and Liener, 1976).  
82 In this context, it seems like the underlying endocrine signal that facilitates these adaptations is  
83 gut-derived cholecystokinin (CCK), which responds to a lower influx of free amino acids (AA)  
84 into the enterocytes of the small intestine (Miura et al., 1997). Due to the increased activity of  
85 the pancreas, Lyman and Lepkovski (1957) suggested that the overall depression in growth  
86 performance is mainly due to the high endogenous loss of AA and enzymes secreted from the  
87 pancreas, since the digestive depression itself could be quite efficiently compensated by the  
88 higher pancreatic enzyme secretion.

89 To avoid depression in performance, the heat-labile anti-nutritional factors in soybean products  
90 have to be sufficiently deactivated. Batterham et al. (1993) recommended to reduce TIA in  
91 soybean products for growing pigs to a level of 4.7 mg/g. Similar results were shown in the  
92 studies of Clarke and Wiseman (2007, 2005) for poultry. They concluded that TIA in full-fat  
93 soybeans should not exceed 4.0 mg/g. On the other hand, it is important to avoid protein  
94 denaturation induced heat damage. Pacheco et al. (2014) and Araba and Dale (1990) observed  
95 a decline in performance with decreasing protein solubility in potassium hydroxide (KOH)  
96 below 74% and 70%, respectively, in response to the heat-associated peptide denaturation.  
97 Another indicator for heat damage is the concentration of reactive lysine (Fontaine et al., 2007).  
98 The  $\epsilon$ -amino group of lysine binds irreversibly with reducing sugars during heat treatment. The  
99 balance of adequate denaturation of TI and heat damage is controversial and discussed in  
100 literature: Heger et al. (2016) concluded in their study that growth performance is not impaired  
101 even above TIA of 4.0 mg/g, whereas Hoffmann et al. (2019) observed a linear improvement  
102 in feed efficiency when gradually decreasing TIA below 1.0 mg/g without impairing growth  
103 performance through excessive heat-damage to the protein fraction.

104 The parameter of choice for the determination of the feed protein value is the AA flow at the  
105 terminal ileum (Ravindran et al., 1999). This consists of the undigested and unabsorbed feed-

106 borne AA as well as endogenously secreted AA. The pool of endogenously secreted AA is  
107 further subcategorized into the basal and specific endogenous losses. While the basal losses are  
108 considered to be predominantly affected by the total dry matter intake, the specific AA secretion  
109 appears to be affected by the quantity and characteristics of the protein under study  
110 (Angkanaporn et al., 1997; Dänicke et al., 2000; Souffrant, 2001). Hence, when determining  
111 feed protein quality as a function of AA flow at the terminal ileum, the specific endogenous  
112 AA losses should be considered. However, attempts to quantify endogenous protein secretion  
113 yield highly variable results (Donkoh and Moughan, 1999). Therefore, Rodehutsord et al.  
114 (2004) proposed an approach by which the digestibility of the dietary protein until the end of  
115 the ileum (so called “prececal digestibility”) is estimated through linear regression, as the slope  
116 of increasing apparently digested AAs until the terminal ileum with gradually increasing dietary  
117 AA intake via the feed protein under study. This method is supposed to exclude effects of  
118 varying endogenous protein losses, since the slope represents the prececal AA digestibility as  
119 affected by the protein source under study.

120 This study aimed to investigate the effects of differentially treated expeller extracted soybean  
121 meal (ESBM) and associated finely graded differences in dietary TIA in the feeding of broilers.  
122 In particular, the prececal amino acid digestibility according to Rodehutsord et al. (2004) as  
123 well as the zootechnical performance of birds were investigated.

## 124 **2. Materials and Methods**

### 125 ***2.1 Soybean processing and diet composition***

126 Raw material for soy processing consisted of two homogenous batches of soybeans. In Batch 1  
127 (breed: Sultana, native TIA: 37.3 mg/g) were conventionally produced soybeans, harvested in  
128 Germany, Batch 2 (breed: Merlin, native TIA: 40.5 mg/g) consisted of organically produced  
129 soybeans from Romania. These two batches were treated equally using four different processing  
130 techniques (thermal, hydrothermal, pressure and kilning) at varying processing intensities.

131 For the thermal treatment, soybeans were moistened and toasted for 40 seconds at either 115°C  
132 or 120°C, respectively. The hydrothermal method comprised the usage of steam at an average  
133 temperature of 103°C for about 40 minutes. The third method included hydrothermal treatment  
134 in combination with expander extrusion at intensities varying from 110°C to 130°C for at least  
135 one second to a maximum of five seconds. Using the kilning method, anti-nutritional factors  
136 were heat inactivated by hot recirculating air at 130°C up to 190°C with varying duration from  
137 20 to 40 minutes. After cooling, all differently treated soybeans were mechanically de-oiled. In  
138 this way 45 differently ESBM were created. Table 1 presents the different treatments in detail,  
139 which have been already described earlier by Hoffmann et al. (2017). The intention with this  
140 processing scheme was to create a wide range of TIA and parameters associated with potential  
141 heat-damage to the protein fraction (KOH solubility, reactive lysine) to investigate the anti-  
142 nutritional effect of TIA and its potential interaction with protein damage on the AA utilization  
143 within the small intestine. The processing in general was not the objective of the present study,  
144 which experimental design would be not appropriate to investigate effects arising from different  
145 processing plants. The TIA in ESBM variants ranged from 0.3 mg/g to 23.6 mg/g, KOH soluble  
146 crude protein (CP) varied from 64.4% to 97.7% of total CP and reactive lysine from 14.7% to  
147 25.0% of DM. TIA and heat-damage parameters, as well as AA concentrations are presented in  
148 Table 2. The processed ESBM were then merged into the basal diet (Table 3) at either 15% (CP  
149 level 1) or 30% (CP level 2) at the expense of maize starch according to Rodehutschord et al.  
150 (2004). Thereby, 91 experimental diets were mixed and subsequently pelletized to stabilize  
151 particle size distribution. All diets included 0.5% of titanium dioxide (TiO<sub>2</sub>) as an indigestible  
152 marker. The TIA in the final feed mixtures varied from 0.4 mg/g in the non-supplemented basal  
153 diet to 8.5 mg/g in the diet containing non-heated ESBM at the highest inclusion rate (30%).

154

## 155        **2.2 Animals and experimental protocol**

156        The study design was reviewed and approved by the responsible animal welfare officer of the  
157        Technical University of Munich and registered and approved by the legal authorities of the  
158        District Government of Lower Franconia, Federal State of Bavaria, Germany (registered case  
159        no. 55.2-DMS 2532-2-2164). The experiments took place at the Department for Education and  
160        Poultry Research, Bavarian State Research Center for Agriculture in Kitzingen (Germany).

161        The experiment was designed according to the model suggested by Rodehutschord et al. (2004).  
162        A total of 5,460 1-day-old male broiler chickens (Ross 308) were obtained from a local hatchery  
163        (Brütereie Süd, Regenstauf, Germany). Animals were reared with a commercial starter diet (CP  
164        215 g/kg, 14 g/kg lysine, 12.5 MJ ME/kg) fed *ad libitum* from experimental day 1 to 14. On  
165        day 15, birds were weighed and randomly allocated to one of 546 pens (10 birds per pen, 1.6  
166        m<sup>2</sup> per pen) equipped with feeder, nipple drinker and straw beddings. The 91 experimental diets  
167        were randomly distributed over pens, yielding an effective sample size of six replicates per  
168        feeding group. The diets were fed *ad libitum* until day 22 on which birds were weighed  
169        individually and euthanized by asphyxiation with carbon dioxide. The animals' body cavities  
170        were immediately opened; the section between Meckel's diverticulum and 2 cm anterior to the  
171        ileo-ceca-colonic-junction was isolated. The ileal content of two thirds of the terminal section  
172        was flushed with distilled water according to the method of Kluth et al. (2005). The digesta was  
173        pooled within each pen, frozen at -20°C and freeze-dried for later chemical analyses.

174        Throughout this study, birds had *ad libitum* access to drinking water (tap water) and the water  
175        consumption per pen was monitored continuously.

## 176        **2.3 Chemical analyses**

177        Raw soybean batches, ESBM and experimental diets were analyzed for TIA (DIN EN ISO  
178        14902:2002-02) and crude nutrient values according to published procedures (VDLUFU,

179 2012). Furthermore, ESBM were analyzed for protein solubility in KOH (DIN EN ISO  
180 14244:2014-02) and reactive lysine according to the homoarginine method applied by Pahn et  
181 al. (2008) to assess protein denaturation. AA content of ESBM, experimental diets and digesta  
182 were determined by ion-exchange chromatography referring to Llames and Fontaine (1994).  
183 According to this method, the oxidized cysteine- dimer cystine was measured. TiO<sub>2</sub> in diets and  
184 digesta were analyzed according to the method of Brandt and Allam (1987). Analyzed crude  
185 nutrients and AA concentration of experimental diets are presented in Table 4.

#### 186 *2.4 statistical analyses and calculations*

187 Apparent prececal digestibility coefficients (DC) for CP, sum of essential amino acids (SEAA),  
188 sum of non-essential amino acids (SNEAA), as well as for individual AA were calculated using  
189 the formula:

$$190 \quad DC_{AA \text{ diet}} = 100 - \left( \frac{TiO_2 \text{ diet} \times AA_{digesta}}{TiO_2 \text{ digesta} \times AA_{diet}} \right)$$

191 TiO<sub>2 diet</sub> and TiO<sub>2 digesta</sub> represent the dry matter concentrations of TiO<sub>2</sub> in the diet and digesta  
192 and AA<sub>diet</sub> and AA<sub>digesta</sub> are the dry matter concentration of AA in diet and digesta.

193 The obtained DCs were then used to estimate the apparent prececal CP and AA digestibility in  
194 regard to the dietary ingested amount of AA at given inclusion level of respective ESBM  
195 variants. The partial prececal AA digestibility from each ESBM was estimated by linear  
196 regression technique, using the slope of apparent ileal AA flux at the terminal ileum in relation  
197 to the respective increase in AA intake in response to rising dietary contents of respective  
198 ESBM variants (Rodehutschord et al., 2004). Additionally, the ratio of sulfuric AA to lysine was  
199 calculated to indicate changes in the biological value and quality of the true protein from  
200 different ESBM variants.

201 For statistical analyses, calculated mean values over single pens within experimental runs  
202 yielded to a total of 546 data points. For each experimental diet, a mean value was calculated



203 including the respective six replicate values. In this way, 91 values for zootechnical parameters  
204 in response to different diets and each 45 data points for the apparent prececal CP and AA  
205 digestibility of each ESBM variant were calculated. These values were used for linear regression  
206 analysis ( $y = a + bx$ ) applying the variables TIA, KOH-soluble CP and reactive lysine,  
207 respectively (The R Project, Version 3.6.1). The threshold of significance was as assumed at  $p$   
208  $\leq 0.05$ . Finally, each of 546 pen-wise mean values of partial digestibility data was further used  
209 for descriptive statistics.

210 Our experimental design was planned to reach in any case a minimum statistical power of  $1 -$   
211  $\beta = 0.8$ . The respective power analysis was performed with G\*Power 3.1.9.7 (Faul et al., 2007;  
212 Faul et al., 2009) applying the dataset of Hoffmann et al. (2019) for the determination of the  
213 effect size at assumed  $\alpha = 0.05$ .

### 214 **3. Results**

#### 215 ***3.1 Zootechnical performance***

216 Broilers were healthy throughout the experimental phase and mortality was  $<1\%$  and did not  
217 correlate to dietary treatments.

218 In total, zootechnical performance varied considerably between individual pens. Live weight  
219 (LW) at the end of the experimental phase (d22) varied from 752g to 985g, Total weight gain  
220 (TWG) and feed conversion ratio (FCR) ranged from 313g and 1.50 in the group with the  
221 highest dietary TIA (8.5 mg/g) to 539g and 1.19 in the group with the lowest dietary TIA (0.4  
222 mg/g).

223 As shown in figure 1 and table 5, rising dietary TIA negatively affected final LW, TWG, total  
224 feed intake (TFI) as well as FCR in a straight linear manner ( $p < 0.001$ ). Accordingly, a stepwise  
225 increase of dietary TIA of 1 mg/g depressed LW, TWG, and TFI by 15.0 g, 16.5 g and 5.7 g,  
226 and increased FCR by 0.015.

227 The dietary amounts of KOH-soluble CP as well as the reactive lysine had no significant effect  
228 on zootechnical performance whatsoever (data not shown).

### 229 *3.2 Partial prececal amino acid digestibility from different ESBM variants*

230 Table 6 presents descriptive statistics of prececal digestibility of AA and CP arising from the  
231 ingestion of different ESBM variants. Like zootechnical performance, partial prececal  
232 digestibility varied noticeably with rising TIA levels. DC of CP, SEAA and SNEAA varied  
233 from 30.33% to 97.21%, 26.76% to 95.12% and 31.63% to 93.25%, respectively.

234 According to figure 2 and table 7, prececal digestibility of all individual AA as well as of CP  
235 of ESBM variants was significantly affected by the respective TIA level in a straight linear  
236 fashion ( $p < 0.001$ ). On average, each increase of TIA by 1 mg/g reduced digestibility of CP as  
237 well as sums of essential AA and non-essential AA by 1.84%, 1.99% and 1.75%, respectively.  
238 The magnitude of TIA effects on AA digestibility differed between individual AA. Arginine  
239 digestion was least affected by TIA with an average value for all used ESBM of 82% but ranged  
240 from 44.8% to 96.5%. In contrast, the digestibility of cystine was impaired the most by  
241 increasing dietary TIA levels, with only 10.59% of prececal digestibility when feeding raw  
242 ESBM (23.6 mg/g TIA). The measured maximum of prececal cystine digestibility was at 83%  
243 (0.3 mg/g TIA), which also fell below the maxima of all other AA ( $\geq 89\%$ ). Linear regression  
244 models were established to quantify the impact of TIA on individual AA digestibility (table 7),  
245 which decreased in any case significantly ( $p < 0.001$ ) with increasing levels of TIA. In figure  
246 2, the effect of TIA on digestibility of CP, SEAA, SNEAA, lysine, methionine and cystine is  
247 illustrated. Furthermore, the ratio of digestible sulfur containing AA to lysine was calculated to  
248 characterize the impact of TIA on the biological value of the digestible AA (figure 3). Per unit  
249 increase of TIA in ESBM, the ratio of ileal digested sulfuric AA to lysine significantly  
250 decreased by 0.0002 (from ~0.9 down to ~0.5) ( $p < 0.001$ ).

251 Prececal digestibility of CP and AAs was not significantly affected by the amount of KOH-  
252 soluble CP or reactive lysine, respectively (data not shown).

#### 253 **4. Discussion**

254 In recent years, there have been several studies concerning the negative effect of TIA on growth  
255 performance of different animal models including rats (Grant et al., 1995), pigs (Batterham et  
256 al., 1993; Herkelman et al., 1992; Zollitsch et al., 1993), chickens (Clarke and Wiseman, 2007,  
257 2005) and turkeys (Mian and Garlich, 1995). All these studies gained comparable results: the  
258 lower TIA in feed, the better growth performance. Consequently, soybeans are treated with heat  
259 and pressure to reduce this anti-nutritional potential to ensure proper performance and animal  
260 wellbeing. Clarke and Wiseman (2007, 2005) claim in their studies to reduce the TIA in full-  
261 fat soybeans to 4.0 mg/g is sufficient for broilers. Nevertheless, an overtreatment of soybeans  
262 can also lead to decreased growth performance (Araba and Dale, 1990; Pacheco et al., 2014).  
263 In the present study, the solubility of CP in KOH varied from 64.4% to 97.7% of total CP and  
264 reactive lysine ranged from 14.7% to 25.0% of DM. Neither CP solubility in KOH, nor reactive  
265 lysine correlated with growth performance or AA digestibility. This is in good agreement to  
266 earlier published data of Herkelman et al. (1991), who gained in their trials the highest chick  
267 performance at a minimum of 50% protein solubility. Furthermore, Hoffmann et al. (2019) fed  
268 experimental diets comparable to ours during a whole fattening trial with broiler chickens and  
269 did not observe any negative effects of KOH-soluble CP or reactive lysine whatsoever.  
270 Therefore, we conclude that protein denaturation by heat treatment of ESBM variants from the  
271 present study was negligible and TIA was the dominant antinutritional factor modulating  
272 zootechnical performance and protein digestibility.

273 The aforementioned study of Hoffmann et al. (2019), observed a straight linear decrease of  
274 zootechnical performance and especially feeding efficiency of broiler chicks when fed diets  
275 with finely graded differences in dietary TIA ranging from 0.3-8.7 mg/g. In fact, using ESBM

276 with TIA below 4.0 mg/g further improved feed efficiency of up to 16% until the end of the  
277 grower stage. In the present study, we observed a significant linear reduction in LW and TWG.  
278 Consistent with Hoffmann et al. (2019), this effect responded in a straight linear fashion  
279 indicating further improvement of production efficiency when decreasing TIA in full-fat  
280 soybeans below 4.0 mg/g. However, TFI and FCR were less impaired by TIA than LW and  
281 TWG, which seems to contradict earlier data at first glance. However, the experimental phase  
282 in our trials was set from day 15 to day 22 according to the experimental model of Rodehutsord  
283 et al. (2004) whereas Hoffmann et al. (2019) observed the zootechnical performance throughout  
284 the whole grower and finisher stages of fattening. This may explain why TFI and FCR was less  
285 responsive in the present study. Clarke and Wiseman (2007), who recorded weight gain and  
286 feed intake for only 3 days observed also decreased weight gain with rising TIA levels but no  
287 significant correlation to feed intake. They concluded, that the recording phase of these  
288 parameters have to be at least 21 days to gain stable results.

289 For the estimation of feed protein quality, the determination of prececal digestibility is the most  
290 common method today. The method is based on the idea of measuring the “unabsorbed” AA  
291 directly in the terminal ileum and estimating the product specific digestibility by calculating the  
292 slope of increasing apparently digested amounts of AA at the terminal ileum over a graded  
293 increase in the intake of product-specific AA. The advantage of this method is that digesta are  
294 collected directly from the terminal ileum, which means there is negligible bias by microbial  
295 fermentation and no contamination with renal excretions and other materials. In addition, since  
296 the slope predominantly reflects the product-specific AA digestibility, there is no need to  
297 correct the data for the endogenously secreted amounts of AA. This has been demonstrated by  
298 Rodehutsord et al. (2004), who observed a linear relationship between product-specific AA  
299 intake and quantitative AA flow at the terminal ileum. Kluth et al. defined in 2005 the section  
300 of the intestine which needs to be collected. Regarding recent literature, many authors have

301 used this method for estimating protein quality in different feedstuff for broiler chickens (Short  
302 et al., 1999, Kluth and Rodehutschord, 2009, Foltyn et al., 2015, Rada et al., 2017).

303 In the present study, AA digestibility from individual ESBM products showed the same linear  
304 response to TIA as growth performance. The higher TIA in the respective soybean product, the  
305 lower the associated digestibility. TIA affected the apparent digestibility of every individual  
306 AA. The DC of arginine, glutamic acid, phenylalanine and lysine were the least affected AA.  
307 In contrary to those, cystine and methionine showed a markedly increased responsiveness to  
308 TIA in ESBM. At 0.3 mg/g TIA 83.5% of cystine were apparently digested in the terminal  
309 ileum, whereas at TIA of 22.6 mg/g only 4.9% of cystine was absorbed. This is in good  
310 agreement with the findings of Clarke and Wiseman (2007). They found out that DC of cysteine  
311 and methionine showed the strongest correlation to TIA. In their trials, DC varied from 71.8%  
312 at 1.9 mg/g to 34.5% at 14.8 mg/g.

313 One explanation for the negative impact of elevated dietary TIA levels on AA digestibility  
314 could be that TI bind irreversibly on the digestive enzymes trypsin and chymotrypsin and  
315 thereby impair protein digestion. Foltyn et al. (2015) measured the trypsin activity in the  
316 jejunum and discovered a reduction in enzyme activity when feeding raw full fat soybeans to  
317 chickens for 4 days. This period is comparable to that from the present study. Hence, it appears  
318 plausible that the activity of trypsin and chymotrypsin were negatively affected by KTI and  
319 BBI from ESBM of the present study. This conclusion may vary under experimental conditions  
320 comprising longer periods of treatment feeding, since the organism tends to adapt over time to  
321 the antinutritive stimulus by increased pancreatic secretion to satiate the binding sites of the  
322 inhibitor pool and provide a surplus of active trypsin and chymotrypsin (Lyman and Lepkovski,  
323 1957; Nitsan and Liener, 1976). In addition, BBI from soybeans contain many disulfide bonds  
324 and are consequently rich in cysteine (Odani and Ikenaka, 1973). Accordingly, the higher

325 amounts of sulfur-containing AA at the terminal ileum may also derive from an enrichment of  
326 BBI with further increase in the dietary proportion of ESBM with high TIA.  
327 Besides that, high endogenous losses of cysteine and methionine may further explain the high  
328 concentrations of sulfuric AA at the terminal ileum. Trypsin and chymotrypsin are rich in  
329 sulfur-containing AA (Nitsan and Liener, 1976). Peptide hormone CCK promotes the exocrine  
330 pancreatic synthesis and secretion of the digestive enzymes in response to increasing TIA in  
331 the small intestinal lumen. Fölsch et al. (1978) reported that continuous injections with CCK  
332 increased the pancreatic weight of rats. They could also prove a hypertrophy and hyperplasia  
333 of the gland. Furuse et al. (1990) observed in their survey a prompt increase of plasma CCK  
334 after 15 minutes, when feeding rats with soybean trypsin inhibitor. In the present study, we used  
335 the same ESBM as Hoffmann et al. (2019). In their feeding trials, a linear increase of pancreatic  
336 weight with rising TIA levels in feed was observed at the end of the finishing phase. Therefore,  
337 it is plausible that there was also increased activity of the exocrine pancreas in the present study,  
338 although presumably to a lower extent given the short experimental duration. At this point, it  
339 is not possible to estimate, which of the above discussed potential causes of the reduced  
340 digestibility of sulfuric AA had the strongest effect on apparent prececal AA digestibility.  
341 Hence, this issue must be addressed in follow-up studies.

342 Increasing TIA from ESBM did not just decrease prececal protein utilization from a quantitative  
343 perspective but also affected the qualitative value of the available protein. Specifically, the ratio  
344 of apparently digested sulfuric AA to lysine decreased linearly with increasing TIA from ~0.9  
345 to ~0.5, which was due to the aforementioned disproportionately higher digestive depression  
346 for cysteine compared to other AA and especially lysine. In other terms, the degree of TIA  
347 reduced the biological value of the absorbed true protein. The biological value of feed protein  
348 reflects how close the spectrum of amino acids represents the ideal protein for growing  
349 organisms. The closer the amino acid spectrum in feed resembles the ideal protein at a given  
350 stage of the production cycle, the lesser total CP and true protein is necessary to meet the

351 animals demand (van Milgen and Dourmad, 2015). Hence, an increasing dietary TIA by usage  
352 of poorly processed ESBM further increases the necessity to either increase total ESBM in  
353 complete feed or to balance the AA spectrum by adding crystalline AA. Both strategies increase  
354 feed costs and thus impair the economic success of poultry production.

355 In conclusion, varying dietary TIA from the usage of differentially processed ESBM variants  
356 negatively affected zootechnical performance and prececal AA digestibility in a straight linear  
357 fashion. Every single AA was affected but cysteine showed the lowest values over the whole  
358 range of applied TIA. To the best of our knowledge, this is the first study to show significant  
359 effects of TIA <4.0 mg/g in soy products on prececal AA digestion. The linearity of the  
360 observed effects questions the suitability of defined upper limits for TIA in soybean products.

361 In contrast, the KOH-soluble CP as well as the amounts of reactive lysine in respective diets  
362 did not affect the investigated parameters. This suggests, that TIA could be decreased close to  
363 zero under the present conditions without promoting negative effects through excessive  
364 denaturation or formation of maillard products. In addition to the quantitative effects of TIA on  
365 feed protein utilization, it was further observed that the quality of the digestible spectrum of  
366 AA decreased significantly. This was evident by a marked change in the ratio of sulfuric AA to  
367 lysine. Overall, these findings suggest that the TIA of dietary components should be considered  
368 when determining their protein value *in vivo*.

369 **Declaration of interest**

370 None.

371

372 **Author contributions**

373 **S. Kuenz:** Formal analysis, Investigation, Writing – Original Draft, Visualization, Project  
374 administration **S. Thurner:** Conceptualization, Funding acquisition, Resources, Project  
375 administration, Supervision **D. Hoffmann:** Conceptualization, Investigation **K. Kraft:**  
376 Conceptualization, Investigation **M. Wiltafsky:** Investigation **K. Damme:** Resources **W.**  
377 **Windisch:** Conceptualization, Writing – Review & Editing, Supervision **D. Brugger:**  
378 Conceptualization, Writing – Review & Editing, Supervision.

379

380 **Acknowledgements**

381 The project was supported by funds of the Federal Ministry of Food and Agriculture (BMEL)  
382 based on a decision of the Parliament of the Federal Republic of Germany via the Federal Office  
383 for Agriculture and Food (BLE) under the innovation support program (Grant number:  
384 2814EPS022). Thanks to the staff of the Chair of Animal Nutrition, the Department for  
385 Education and Poultry Research and the Institute of Agricultural Engineering and Animal  
386 Husbandry for excellent technical assistance. The authors are especially grateful to Prof.  
387 Rodehutschord (Hohenheim University) and his team for the mixing of the experimental diets.

388



## 389 References

- 390 Abbey, B.W., Norton, G., Neale, R.J., 1979. Effects of dietary proteinase inhibitors from field  
391 bean (*Vicia faba* L.) and field-bean meal on pancreatic function in the rat. *Br. J. Nutr.* 41  
392 (1), 39–45. <https://doi.org/10.1079/BJN19790009>.
- 393 Angkanaporn, K., Ravindran, V., Mollah, Y., Bryden, W.L., 1997. Evaluation of  
394 homoarginine as a marker for the determination of endogenous amino acid concentrations  
395 in poultry excreta. *Br. Poult. Sci.* 38 (5), 577–585.  
396 <https://doi.org/10.1080/00071669708418039>.
- 397 Araba, M., Dale, N.M., 1990. Evaluation of Protein Solubility as an Indicator of  
398 Overprocessing Soybean Meal. *Poult. Sci.* 69 (1), 76–83.  
399 <https://doi.org/10.3382/ps.0690076>.
- 400 Batterham, E.S., Saini, H.S., Andersen, L.M., Baigent, R.D., 1993. Tolerance of growing pigs  
401 to trypsin and chymotrypsin inhibitors in chickpeas (*Cicer arietinum*) and pigeonpeas  
402 (*Cajanus cajan*). *J. Sci. Food Agric.* 61 (2), 211–216.  
403 <https://doi.org/10.1002/jsfa.2740610212>.
- 404 Brandt, M., Allam, S.M., 1987. Analytik von TiO<sub>2</sub> im Darminhalt und Kot nach  
405 Kjedadlaufschiuß. *Arch. Anim. Nutr.* (37), 453–454.
- 406 Clarke, E., Wiseman, J., 2000. Developments in plant breeding for improved nutritional  
407 quality of soya beans II. Anti-nutritional factors. *J. Agric. Sci.* 134 (2), 125–136.  
408 <https://doi.org/10.1017/S0021859699007443>.
- 409 Clarke, E., Wiseman, J., 2005. Effects of variability in trypsin inhibitor content of soya bean  
410 meals on true and apparent ileal digestibility of amino acids and pancreas size in broiler  
411 chicks. *Anim. Feed Sci. Technol.* 121 (1-2), 125–138.  
412 <https://doi.org/10.1016/j.anifeedsci.2005.02.012>.
- 413 Clarke, E., Wiseman, J., 2007. Effects of extrusion conditions on trypsin inhibitor activity of  
414 full fat soybeans and subsequent effects on their nutritional value for young broilers. *Br.*  
415 *Poult. Sci.* 48 (6), 703–712. <https://doi.org/10.1080/00071660701684255>.
- 416 Dänicke, S., Böttcher, W., Jeroch, H., Thielebein, J., Simon, O., 2000. Replacement of  
417 soybean oil with tallow in rye-based diets without xylanase increases protein synthesis in  
418 small intestine of broilers. *J. Nutr.* 130 (4), 827–834. <https://doi.org/10.1093/jn/130.4.827>.
- 419 DIN EN ISO 14244:2014-02. Oilseed meals - Determination of soluble proteins in potassium  
420 hydroxide solution. Beuth Verlag GmbH, Berlin. <https://doi.org/10.31030/2552457>.
- 421 DIN EN ISO 14902:2002-02. Animal feeding stuffs - Determination of trypsin inhibitor  
422 activity of soya products. Beuth Verlag GmbH, Berlin. <https://doi.org/10.31030/9186137>.
- 423 Donkoh, A., Moughan, P.J., 1999. Endogenous ileal nitrogen and amino acid flows in the  
424 growing pig receiving a protein-free diet and diets containing enzymically hydrolysed  
425 casein or graded levels of meat and bone meal. *Anim. Sci.* 68 (3), 511–518.  
426 <https://doi.org/10.1017/S1357729800050530>.
- 427 Faul, F., Erdfelder, E., Buchner, A., Lang, A.-G., 2009. Statistical power analyses using  
428 G\*Power 3.1: tests for correlation and regression analyses. *Behavior research methods* 41  
429 (4), 1149–1160. <https://doi.org/10.3758/BRM.41.4.1149>.
- 430 Faul, F., Erdfelder, E., Lang, A.-G., Buchner, A., 2007. G\*Power 3: a flexible statistical  
431 power analysis program for the social, behavioral, and biomedical sciences. *Behavior*  
432 *research methods* 39 (2), 175–191. <https://doi.org/10.3758/bf03193146>.

- 433 Fölsch, U.R., Winckler, K., Wormsley, K.G., 1978. Influence of Repeated Administration of  
434 Cholecystokinin and Secretin on the Pancreas of the Rat. *Scand. J. Gastroenterol.* 13 (6),  
435 663–671. <https://doi.org/10.3109/00365527809181779>.
- 436 Foltyn, M., Lichovníková, M., Rada, V., Musilová, A., 2015. Apparent ileal digestibility of  
437 protein and amino acids in protein feedstuffs and trypsin activity in the small intestine in  
438 broiler chickens. *Czech J. Anim. Sci.* 60 (8), 375–382. [https://doi.org/10.17221/8407-](https://doi.org/10.17221/8407-CJAS)  
439 CJAS.
- 440 Fontaine, J., Zimmer, U., Moughan, P.J., Rutherfurd, S.M., 2007. Effect of heat damage in an  
441 autoclave on the reactive lysine contents of soy products and corn distillers dried grains  
442 with solubles. Use of the results to check on lysine damage in common qualities of these  
443 ingredients. *J. Agric. Food Chem.* 55 (26), 10737–10743.  
444 <https://doi.org/10.1021/jf071747c>.
- 445 Furuse, M., Yang, S.I., Muramatsu, T., Okumura, J., 1990. Enhanced Release of  
446 Cholecystokinin by Soya-Bean Trypsin Inhibitor in Chickens. *Scand. J. Gastroenterol.* 25  
447 (12), 1242–1246. <https://doi.org/10.3109/00365529008998560>.
- 448 Gertler, A., Birk, Y., Bondi, A., 1967. A comparative study of the nutritional and  
449 physiological significance of pure soybean trypsin inhibitors and of ethanol-extracted  
450 soybean meals in chicks and rats. *J. Nutr.* 91 (3\_suppl), 358–370.  
451 [https://doi.org/10.1093/jn/91.3\\_Suppl.358](https://doi.org/10.1093/jn/91.3_Suppl.358).
- 452 Grant, G., Dorward, P.M., Buchan, W.C., Armour, J.C., Pusztai, A., 1995. Consumption of  
453 diets containing raw soya beans (*Glycine max*), kidney beans (*Phaseolus vulgaris*),  
454 cowpeas (*Vigna unguiculata*) or lupin seeds (*Lupinus angustifolius*) by rats for up to 700  
455 days: effect on body composition and organ weights. *Br. J. Nutr.* 73 (1), 17–29.  
456 <https://doi.org/10.1079/BJN19950005>.
- 457 Gu, C., Pan, H., Sun, Z., Qin, G., 2010. Effect of soybean variety on anti-nutritional factors  
458 content, and growth performance and nutrients metabolism in rat. *Int. J. Mol. Sci.* 11 (3),  
459 1048–1056. <https://doi.org/10.3390/ijms11031048>.
- 460 Heger, J., Wiltafsky, M., Zelenka, J., 2016. Impact of different processing of full-fat soybeans  
461 on broiler performance. *Czech J. Anim. Sci.* 61 (No. 2), 57–66.  
462 <https://doi.org/10.17221/8728-CJAS>.
- 463 Herkelman, K.L., Cromwell, G.L., Stahly, T.S., 1991. Effects of heating time and sodium  
464 metabisulfite on the nutritional value of full-fat soybeans for chicks. *J. Anim. Sci.* 69 (11),  
465 4477–4486. <https://doi.org/10.2527/1991.69114477x>.
- 466 Herkelman, K.L., Cromwell, G.L., Stahly, T.S., Pfeiffer, T.W., Knabe, D.A., 1992. Apparent  
467 digestibility of amino acids in raw and heated conventional and low-trypsin-inhibitor  
468 soybeans for pigs. *J. Anim. Sci.* 70 (3), 818–826. <https://doi.org/10.2527/1992.703818x>.
- 469 Hoffmann, D., Thurner, S., Ankerst, D., Damme, K., Windisch, W., Brugger, D., 2019.  
470 Chickens' growth performance and pancreas development exposed to soy cake varying in  
471 trypsin inhibitor activity, heat-degraded lysine concentration, and protein solubility in  
472 potassium hydroxide. *Poult. Sci.* 98 (6), 2489–2499. <https://doi.org/10.3382/ps/pey592>.
- 473 Kluth, H., Mehlhorn, K., Rodehutsord, M., 2005. Studies on the intestine section to be  
474 sampled in broiler studies on precaecal amino acid digestibility. *Arch. Anim. Nutr.* 59 (4),  
475 271–279. <https://doi.org/10.1080/17450390500217058>.
- 476 Kluth, H., Rodehutsord, M., 2009. Effect of inclusion of cellulose in the diet on the  
477 inevitable endogenous amino acid losses in the ileum of broiler chicken. *Poult. Sci.* 88 (6),  
478 1199–1205. <https://doi.org/10.3382/ps.2008-00385>.

- 479 Koide, T., Ikenaka, T., 1973. Studies on soybean trypsin inhibitors. 1. Fragmentation of  
480 soybean trypsin inhibitor (Kunitz) by limited proteolysis and by chemical cleavage. *Eur. J.*  
481 *Biochem.* 32 (3), 401–407. <https://doi.org/10.1111/j.1432-1033.1973.tb02622.x>.
- 482 Llames, C.R., Fontaine, J., 1994. Determination of Amino Acids in Feeds: Collaborative  
483 Study. *J. AOAC Int* 77, 1362–1402. <https://doi.org/10.1093/jaoac/77.6.1362>.
- 484 Lyman, R.L., Lepkovski, S., 1957. The effect of raw soybean meal and trypsin inhibitor diets  
485 on pancreatic enzyme secretion in the rat. *J. Nutr.* 62 (2), 269–284.  
486 <https://doi.org/10.1093/jn/62.2.269>.
- 487 Mian, M.A., Garlich, J.D., 1995. Tolerance of turkeys to diets high in trypsin inhibitor activity  
488 from untoasted soybean meals. *Poult. Sci.* 74 (7), 1126–1133.  
489 <https://doi.org/10.3382/ps.0741126>.
- 490 Miura, Y., Murayama, H., Tsuzuki, S., Sugimoto, E., Torii, K., Fushiki, T., 1997. Long-term  
491 consumption of an amino acid diet reduces the pancreatic enzyme secretion response to a  
492 trypsin inhibitor in rats. *J. Nutr.* 127 (7), 1377–1381.  
493 <https://doi.org/10.1093/jn/127.7.1377>.
- 494 Nitsan, Z., Liener, I.E., 1976. Enzymic activities in the pancreas, digestive tract and feces of  
495 rats fed raw or heated soy flour. *J. Nutr.* 106 (2), 300–305.  
496 <https://doi.org/10.1093/jn/106.2.300>.
- 497 Odani, S., Ikenaka, T., 1973. Studies on soybean trypsin inhibitors. 8. Disulfide bridges in  
498 soybean Bowman-Birk proteinase inhibitor. *J. Biochem.* 74 (4), 697–715.  
499 <https://doi.org/10.1093/oxfordjournals.jbchem.a130295>.
- 500 Pacheco, W.J., Stark, C.R., Ferket, P.R., Brake, J., 2014. Effects of trypsin inhibitor and  
501 particle size of expeller-extracted soybean meal on broiler live performance and weight of  
502 gizzard and pancreas. *Poult. Sci.* 93 (9), 2245–2252. <https://doi.org/10.3382/ps.2014-03986>.
- 504 Pahn, A.A., Pedersen, C., Stein, H.H., 2008. Application of the reactive lysine procedure to  
505 estimate lysine digestibility in distillers dried grains with solubles fed to growing pigs. *J.*  
506 *Agric. Food Chem.* 56 (20), 9441–9446. <https://doi.org/10.1021/jf801618g>.
- 507 Perilla, N.S., Cruz, M.P., Belalcázar, F. de, Diaz, G.J., 1997. Effect of temperature of wet  
508 extrusion on the nutritional value of full-fat soybeans for broiler chickens. *Br. Poult. Sci.*  
509 38 (4), 412–416. <https://doi.org/10.1080/00071669708418011>.
- 510 Rada, V., Lichovnikova, M., Safarik, I., 2017. The effect of soybean meal replacement with  
511 raw full-fat soybean in diets for broiler chickens. *Journal of Applied Animal Research* 45  
512 (1), 112–117. <https://doi.org/10.1080/09712119.2015.1124337>.
- 513 Ravindran, V., Hew, L.I., Ravindran, G., Bryden, W.L., 1999. A comparison of ileal digesta  
514 and excreta analysis for the determination of amino acid digestibility in food ingredients  
515 for poultry. *Br. Poult. Sci.* 40 (2), 266–274. <https://doi.org/10.1080/00071669987692>.
- 516 Rodehutschord, M., Kapocius, M., Timmler, R., Dieckmann, A., 2004. Linear regression  
517 approach to study amino acid digestibility in broiler chickens. *Br. Poult. Sci.* 45 (1), 85–  
518 92. <https://doi.org/10.1080/00071660410001668905>.
- 519 Short, F.J., Wiseman, J., Boorman, K.N., 1999. Application of a method to determine ileal  
520 digestibility in broilers of amino acids in wheat. *Anim. Feed Sci. Technol.* 79 (3), 195–  
521 209. [https://doi.org/10.1016/S0377-8401\(99\)00022-X](https://doi.org/10.1016/S0377-8401(99)00022-X).
- 522 Souffrant, W.B., 2001. Effect of dietary fibre on ileal digestibility and endogenous nitrogen  
523 losses in the pig. *Anim. Feed Sci. Technol.* 90 (1-2), 93–102.  
524 [https://doi.org/10.1016/S0377-8401\(01\)00199-7](https://doi.org/10.1016/S0377-8401(01)00199-7).

- 525 van Milgen, J., Dourmad, J.-Y., 2015. Concept and application of ideal protein for pigs. J.  
526 Anim. Sci. Biotechnol. 6 (1), 15. <https://doi.org/10.1186/s40104-015-0016-1>.
- 527 VDLUFA, 2012. Handbuch der Landwirtschaftlichen Versuchs-und Untersuchungsmethodik  
528 (VDLUFA-Methodenbuch): Bd. III, Die chemische Untersuchung von Futtermitteln.  
529 VDLUFA-Verl., Darmstadt.
- 530 Zollitsch, W., Wetscherek, W., Lettner, F., 1993. Use of differently processed full-fat  
531 soybeans in a diet for pig fattening. Anim. Feed Sci. Technol. 41 (3), 237–246.  
532 [https://doi.org/10.1016/0377-8401\(93\)90016-D](https://doi.org/10.1016/0377-8401(93)90016-D).

533 **Table**

534 Table 1: Soybean processing scheme for treatment technique and intensities adapted according to Hoffmann  
 535 et al (2017)

| Thermal processing<br>[°C; min] | Hydrothermal processing<br>[ST: min, LT: min, Exp.: °C] <sup>1</sup> | Pressure and thermal processing | Kilning and thermal processing<br>[°C; min] |
|---------------------------------|----------------------------------------------------------------------|---------------------------------|---------------------------------------------|
| 115; 0.6                        | ST: 0; LT: 00; Exp.: 0                                               | ST: 1; LT: 00; Exp.: 110        | 0; 0                                        |
| 120; 0.6                        | ST: 1; LT: 03; Exp.: 0                                               | ST: 1; LT: 03; Exp.: 110        | 130; 40                                     |
|                                 | ST: 1; LT: 12; Exp.: 0                                               | ST: 1; LT: 03; Exp.: 130        | 140; 20                                     |
|                                 | ST: 1; LT: 48; Exp.: 0                                               | ST: 1; LT: 12; Exp.: 110        | 140; 30                                     |
|                                 |                                                                      | ST: 1; LT: 12; Exp.: 130        | 140; 40                                     |
|                                 |                                                                      | ST: 1; LT: 48; Exp.: 110        | 160; 30                                     |
|                                 |                                                                      | ST: 1; LT: 48; Exp.: 130        | 165; 20                                     |
|                                 |                                                                      |                                 | 165; 30                                     |
|                                 |                                                                      |                                 | 190; 20                                     |
|                                 |                                                                      |                                 | 190; 30                                     |

536 <sup>1</sup>ST: short time conditioning (90°C); LT: long time conditioning (100°C); Exp: expander

537

538

539 Table 2: Average chemical composition, crude protein quality and amino acid concentration, as well as range of processed expeller extracted soybean  
 540 meals sorted according to treatment technique. All parameters are represented in percentage of dry matter, if not indicated otherwise

|                              | Thermal processing |            | Hydrothermal processing |            | Pressure and thermal processing |            | Kilning and thermal processing |            |
|------------------------------|--------------------|------------|-------------------------|------------|---------------------------------|------------|--------------------------------|------------|
|                              | Average            | Range      | Average                 | Range      | Average                         | Range      | Average                        | Range      |
| <i>Chemical composition</i>  |                    |            |                         |            |                                 |            |                                |            |
| Dry matter                   | 96.9 ± 0.7         | 96.0- 97.8 | 87.2 ± 1.7              | 83.9- 90.4 | 87.1 ± 1.5                      | 83.9- 89.0 | 95.6 ± 1.0                     | 93.9- 96.9 |
| Crude protein                | 49.9 ± 3.4         | 45.9- 53.0 | 47.3 ± 1.3              | 45.4- 49.3 | 47.2 ± 1.3                      | 45.4- 49.3 | 45.7 ± 1.5                     | 43.0- 47.7 |
| Crude ash                    | 6.4 ± 0.1          | 6.3- 6.5   | 6.4 ± 0.2               | 6.1- 6.7   | 6.4 ± 0.2                       | 6.1- 6.7   | 6.2 ± 0.2                      | 5.9- 6.7   |
| Crude fat                    | 10.0 ± 1.5         | 8.6- 11.9  | 10.8 ± 1.1              | 9.3- 13.1  | 10.4 ± 1.4                      | 6.4- 13.7  | 12.1 ± 2.0                     | 9.8- 15.4  |
| Crude fiber                  | 7.7 ± 1.6          | 6.3- 10.0  | 7.2 ± 0.6               | 6.3- 8.1   | 7.3 ± 0.6                       | 6.3- 8.6   | 8.8 ± 1.5                      | 7.3- 11.5  |
| <i>Crude protein quality</i> |                    |            |                         |            |                                 |            |                                |            |
| TIA (mg/g DM)                | 2.7 ± 0.9          | 1.9- 3.8   | 4.8 ± 7.1               | 0.3- 23.6  | 2.8 ± 4.0                       | 0.3- 15.9  | 9.7 ± 4.2                      | 5.5- 16.6  |
| KOH (% CP)                   | 81.6 ± 7.9         | 70.1- 88.0 | 83.5 ± 6.9              | 71.7- 97.6 | 82.1 ± 5.1                      | 71.7- 91.8 | 79.3 ± 11.6                    | 64.5- 95.4 |
| Total lysine (g/kg DM)       | 25.9 ± 1.5         | 24.4- 28.0 | 23.6 ± 0.8              | 22.0- 25.0 | 23.4 ± 0.6                      | 22.0- 25.0 | 23.4 ± 1.4                     | 21.4- 25.7 |
| Reactive lysine (g/kg DM)    | 21.0 ± 3.0         | 17.7- 25.0 | 18.5 ± 2.2              | 14.7- 22.0 | 17.9 ± 1.9                      | 14.7- 22.0 | 17.4 ± 3.3                     | 14.7- 22.0 |
| <i>Amino Acids</i>           |                    |            |                         |            |                                 |            |                                |            |
| Alanine                      | 2.04 ± 0.10        | 1.94- 2.16 | 1.74 ± 0.07             | 1.51- 1.81 | 1.75 ± 0.04                     | 1.66- 1.81 | 1.87 ± 0.05                    | 1.78- 1.92 |
| Arginine                     | 3.80 ± 0.36        | 3.43- 4.14 | 3.28 ± 0.20             | 2.59- 3.50 | 3.30 ± 0.12                     | 3.09- 3.50 | 3.33 ± 0.14                    | 3.12- 3.56 |
| Aspartic Acid                | 5.53 ± 0.37        | 5.15- 5.90 | 4.69 ± 0.22             | 3.94- 4.95 | 4.73 ± 0.13                     | 4.47- 4.95 | 4.96 ± 0.15                    | 4.73- 5.16 |
| Cysteine                     | 0.68 ± 0.04        | 0.64- 0.72 | 0.60 ± 0.02             | 0.55- 0.63 | 0.60 ± 0.02                     | 0.55- 0.63 | 0.64 ± 0.02                    | 0.61- 0.68 |
| Glutamic Acid                | 8.77 ± 0.72        | 8.14- 9.53 | 7.47 ± 0.40             | 6.15- 7.90 | 7.53 ± 0.26                     | 7.03- 7.90 | 7.84 ± 0.22                    | 7.50- 8.15 |
| Glycine                      | 2.01 ± 0.10        | 1.91- 2.12 | 1.73 ± 0.07             | 1.48- 1.82 | 1.74 ± 0.04                     | 1.65- 1.82 | 1.84 ± 0.06                    | 1.75- 1.91 |
| Histidine                    | 1.26 ± 0.08        | 1.18- 1.33 | 1.07 ± 0.05             | 0.91- 1.13 | 1.08 ± 0.03                     | 1.02- 1.13 | 1.13 ± 0.04                    | 1.08- 1.18 |
| Isoleucine                   | 2.18 ± 0.12        | 2.07- 2.29 | 1.85 ± 0.08             | 1.58- 1.95 | 1.86 ± 0.05                     | 1.77- 1.95 | 1.97 ± 0.05                    | 1.89- 2.03 |
| Leucine                      | 3.70 ± 0.22        | 3.49- 3.93 | 3.14 ± 0.14             | 2.66- 3.29 | 3.16 ± 0.08                     | 2.99- 3.29 | 3.33 ± 0.09                    | 3.19- 3.45 |
| Lysine                       | 2.93 ± 0.16        | 2.73- 3.10 | 2.56 ± 0.11             | 2.57- 2.71 | 2.58 ± 0.08                     | 2.45- 2.71 | 2.62 ± 0.14                    | 2.40- 2.84 |
| Methionine                   | 0.64 ± 0.03        | 0.61- 0.67 | 0.55 ± 0.02             | 0.49- 0.57 | 0.55 ± 0.01                     | 0.52- 0.57 | 0.59 ± 0.02                    | 0.57- 0.62 |
| Methionine + Cysteine        | 1.33 ± 0.07        | 1.25- 1.39 | 1.15 ± 0.04             | 1.05- 1.19 | 1.15 ± 0.03                     | 1.07- 1.19 | 1.24 ± 0.04                    | 1.19- 1.29 |
| Phenylalanine                | 2.46 ± 0.15        | 2.31- 2.61 | 2.09 ± 0.10             | 1.75- 2.21 | 2.10 ± 0.06                     | 1.99- 2.21 | 2.21 ± 0.07                    | 2.09- 2.30 |
| Proline                      | 2.42 ± 0.12        | 2.30- 2.53 | 2.06 ± 0.11             | 1.74- 2.22 | 2.07 ± 0.08                     | 1.92- 2.22 | 2.18 ± 0.07                    | 2.07- 2.28 |
| Serine                       | 2.45 ± 0.15        | 2.28- 2.61 | 2.08 ± 0.09             | 1.79- 2.18 | 2.10 ± 0.05                     | 1.98- 2.18 | 2.21 ± 0.06                    | 2.11- 2.29 |
| Threonine                    | 1.86 ± 0.09        | 1.77- 1.96 | 1.58 ± 0.06             | 1.38- 1.65 | 1.59 ± 0.03                     | 1.52- 1.65 | 1.70 ± 0.05                    | 1.63- 1.76 |
| Valine                       | 2.30 ± 0.15        | 2.17- 2.44 | 1.96 ± 0.09             | 1.66- 2.09 | 1.98 ± 0.05                     | 1.88- 2.09 | 2.09 ± 0.06                    | 1.99- 2.16 |

541

542 Table 3: Feed composition of basal diet and experimental diets. The experimental diets contained two  
 543 different levels of crude protein (CP level 1 = 220 g/kg CP and CP level 2 = 300 g/kg CP). This resulted in  
 544 two varying inclusions of experimental expeller extracted soybean meal (ESBM) with an equivalent  
 545 reduction of maize starch

| Ingredients (%)                | Basal diet<br>175 g/kg CP | CP level 1<br>220 g/kg CP | CP level 2<br>300 g/kg CP |
|--------------------------------|---------------------------|---------------------------|---------------------------|
| Maize starch                   | 28.00                     | 14.00                     | 0.00                      |
| experimental ESBM              | 0.00                      | 15.00                     | 30.00                     |
| Soybean oil                    | 4.00                      | 3.00                      | 2.00                      |
| Maize                          | -----                     | 46.15                     | -----                     |
| Solvent extracted soybean meal | -----                     | 10.00                     | -----                     |
| Potato protein                 | -----                     | 5.00                      | -----                     |
| Titanium oxide                 | -----                     | 0.50                      | -----                     |
| Mono calcium phosphate         | -----                     | 2.51                      | -----                     |
| Sodium chloride                | -----                     | 0.51                      | -----                     |
| Limestone                      | -----                     | 1.15                      | -----                     |
| Mineral feed                   | -----                     | 0.15                      | -----                     |
| Vitamin premix                 | -----                     | 0.20                      | -----                     |
| Choline chloride 50%           | -----                     | 0.20                      | -----                     |
| L-Lysine HCl                   | -----                     | 0.62                      | -----                     |
| DL-Methionine                  | -----                     | 0.20                      | -----                     |
| L-Arginine                     | -----                     | 0.55                      | -----                     |
| L-Tryptophan                   | -----                     | 0.03                      | -----                     |
| L-Threonine                    | -----                     | 0.23                      | -----                     |

546

547 Table 4: Mean values and standard deviation of analyzed nutrient concentration (% DM) and amino acid  
 548 concentration (% DM) of experimental diets CP level 1 and CP level 2. Standard deviation of Basal diet  
 549 refers to analytical replicate.

| Nutrient concentration (% DM) | Basal diet<br>160 g/kg CP | CP level 1<br>220 g/kg CP | CP level 2<br>300 g/kg CP |
|-------------------------------|---------------------------|---------------------------|---------------------------|
| Dry matter                    | 91.2 ± 0.1                | 91.2 ± 0.5                | 91.2 ± 0.4                |
| Crude protein                 | 15.8 ± 0.1                | 22.7 ± 0.3                | 29.6 ± 0.8                |
| Crude ash                     | 5.49 ± 0.2                | 6.32 ± 0.2                | 7.14 ± 0.2                |
| Crude fat                     | 6.65 ± 0.1                | 7.09 ± 0.4                | 7.62 ± 0.4                |
| Neutral detergent fiber       | 8.73 ± 0.1                | 11.4 ± 1.2                | 13.7 ± 1.9                |
| Acid detergent fiber          | 2.40 ± 0.1                | 3.72 ± 0.6                | 4.02 ± 0.4                |
| Acid detergent lignin         | 0.58 ± 0.1                | 0.99 ± 0.4                | 0.68 ± 0.3                |
| Titanium dioxide              | 0.54 ± 0.1                | 0.56 ± 0.1                | 0.55 ± 0.1                |
| Alanine                       | 0.69 ± 0.1                | 0.97 ± 0.01               | 1.25 ± 0.03               |
| Arginine                      | 1.25 ± 0.1                | 1.77 ± 0.04               | 2.28 ± 0.07               |
| Aspartic Acid                 | 1.28 ± 0.1                | 2.06 ± 0.04               | 2.79 ± 0.08               |
| Cystine                       | 0.20 ± 0.1                | 0.30 ± 0.01               | 0.39 ± 0.01               |
| Glutamic Acid                 | 2.00 ± 0.1                | 3.21 ± 0.06               | 4.39 ± 0.11               |
| Glycine                       | 0.54 ± 0.1                | 0.82 ± 0.01               | 1.10 ± 0.03               |
| Histidine                     | 0.33 ± 0.1                | 0.50 ± 0.01               | 0.65 ± 0.02               |
| Isoleucine                    | 0.56 ± 0.1                | 0.85 ± 0.01               | 1.14 ± 0.03               |
| Leucine                       | 1.26 ± 0.1                | 1.76 ± 0.02               | 2.26 ± 0.06               |
| Lysine                        | 1.18 ± 0.1                | 1.59 ± 0.03               | 1.99 ± 0.05               |
| Methionine                    | 0.41 ± 0.1                | 0.49 ± 0.01               | 0.58 ± 0.01               |
| Methionine + Cysteine         | 0.61 ± 0.1                | 0.79 ± 0.02               | 0.97 ± 0.02               |
| Phenylalanine                 | 0.68 ± 0.1                | 1.03 ± 0.02               | 1.35 ± 0.04               |
| Proline                       | 0.82 ± 0.1                | 1.15 ± 0.02               | 1.49 ± 0.04               |
| Serine                        | 0.64 ± 0.1                | 0.98 ± 0.01               | 1.31 ± 0.03               |
| Threonine                     | 0.77 ± 0.1                | 1.02 ± 0.01               | 1.27 ± 0.03               |
| Tryptophan                    | 0.18 ± 0.1                | 0.26 ± 0.01               | 0.35 ± 0.01               |
| Valine                        | 0.67 ± 0.1                | 0.98 ± 0.02               | 1.29 ± 0.04               |

550



551 Table 5: Effect of trypsin inhibitor activity (mg/g) in experimental diets on live weight on d22 (g/bird), total weight gain (g/bird), total feed intake (g/bird) and  
 552 feed conversion ratio (feed: gain) using linear regression models ( $y = a + bx$ ;  $x = \text{TIA}$ )

|                                 | Regression model | Estimates of a                      | Estimates of b                       | R <sup>2</sup> |
|---------------------------------|------------------|-------------------------------------|--------------------------------------|----------------|
| Live weight (LW) on d22 g/bird  | $y = a + bx$     | a, $930 \pm 4.4$ ( $p < 0.001$ )    | b, $-15.0 \pm 1.8$ ( $p < 0.001$ )   | 0.45           |
| Total weight gain (TWG), g/bird | $y = a + bx$     | a, $504 \pm 4.2$ ( $p < 0.001$ )    | b, $-16.5 \pm 1.7$ ( $p < 0.001$ )   | 0.63           |
| Total feed intake (TFI), g/bird | $y = a + bx$     | a, $698 \pm 3.9$ ( $p < 0.001$ )    | b, $-5.7 \pm 1.6$ ( $p < 0.001$ )    | 0.13           |
| Feed conversion ratio (FCR)     | $y = a + bx$     | a, $1.37 \pm 0.009$ ( $p < 0.001$ ) | b, $0.015 \pm 0.004$ ( $p < 0.001$ ) | 0.17           |

553

554

555 Table 6: Descriptive statistics of prececal digestibility of expeller extracted soybean meal variants (%) of amino acids, crude protein, sum of essential amino acids  
 556 and sum of non-essential amino acids

|                                  | Mean  | Standard Deviation | Median | 25% Quantil | 75% Quantil | Minimum | Maximum |
|----------------------------------|-------|--------------------|--------|-------------|-------------|---------|---------|
| Crude Protein                    | 74.29 | 14.34              | 79.50  | 64.10       | 86.10       | 30.33   | 97.21   |
| Sum of essential amino acids     | 75.60 | 14.67              | 81.28  | 65.95       | 86.56       | 26.76   | 95.12   |
| Sum of non-essential amino acids | 73.53 | 13.38              | 77.84  | 64.35       | 83.78       | 31.63   | 93.25   |
| Alanine                          | 72.30 | 16.56              | 78.73  | 61.77       | 84.21       | 21.64   | 94.21   |
| Arginine                         | 82.64 | 10.33              | 86.66  | 76.37       | 90.02       | 44.84   | 96.51   |
| Aspartic Acid                    | 72.27 | 12.72              | 75.27  | 63.95       | 82.38       | 34.87   | 91.45   |
| Cystine                          | 50.49 | 19.23              | 54.41  | 36.22       | 67.14       | 4.94    | 83.49   |
| Glutamic Acid                    | 79.10 | 11.60              | 83.47  | 71.45       | 87.68       | 39.58   | 95.89   |
| Glycine                          | 68.40 | 14.50              | 71.86  | 58.70       | 80.18       | 25.18   | 90.73   |
| Histidine                        | 74.97 | 13.17              | 79.73  | 67.36       | 84.68       | 29.63   | 92.64   |
| Isoleucine                       | 73.71 | 16.95              | 80.18  | 64.10       | 85.89       | 17.68   | 95.51   |
| Leucine                          | 73.72 | 18.49              | 80.99  | 65.17       | 86.44       | 15.15   | 96.11   |
| Lysine                           | 77.34 | 12.83              | 81.36  | 70.26       | 87.59       | 34.66   | 94.71   |
| Methionine                       | 74.75 | 17.54              | 81.82  | 64.66       | 87.22       | 17.76   | 94.55   |
| Methionine + Cystine             | 62.00 | 18.17              | 67.69  | 48.97       | 76.43       | 10.92   | 89.18   |
| Phenylalanine                    | 77.52 | 15.36              | 84.57  | 68.12       | 87.75       | 27.75   | 98.34   |
| Proline                          | 69.69 | 14.96              | 74.98  | 59.87       | 80.96       | 23.99   | 91.50   |
| Serine                           | 71.95 | 15.41              | 77.53  | 62.71       | 83.41       | 26.71   | 93.46   |
| Threonine                        | 67.97 | 15.08              | 72.49  | 57.64       | 80.58       | 23.93   | 90.62   |
| Tryptophan                       | 69.86 | 14.96              | 74.47  | 60.28       | 81.37       | 25.07   | 90.42   |
| Valine                           | 72.57 | 16.49              | 78.90  | 64.20       | 84.55       | 18.03   | 94.09   |

557

558

559 Table 7: Effect of trypsin inhibitor activity (mg/g) in expeller extracted soybean meals on partial prececal digestibility of crude protein, sum of essential amino  
 560 acids, sum of non-essential amino acids and individual amino acids using linear regression models (regression model:  $y = a + bx$ ;  $x = \text{TIA}$ )

|                                  | Regression models | Estimates of a                      | Estimates of b                      | R <sup>2</sup> |
|----------------------------------|-------------------|-------------------------------------|-------------------------------------|----------------|
| Crude Protein                    | $y = a + bx$      | a, $85.48 \pm 1.85$ ( $p < 0.001$ ) | b, $-1.84 \pm 0.21$ ( $p < 0.001$ ) | 0.64           |
| Sum of essential amino acids     | $y = a + bx$      | a, $87.68 \pm 1.70$ ( $p < 0.001$ ) | b, $-1.99 \pm 0.20$ ( $p < 0.001$ ) | 0.71           |
| Sum of non-essential amino acids | $y = a + bx$      | a, $84.14 \pm 1.68$ ( $p < 0.001$ ) | b, $-1.75 \pm 0.19$ ( $p < 0.001$ ) | 0.66           |
| Alanine                          | $y = a + bx$      | a, $85.75 \pm 1.98$ ( $p < 0.001$ ) | b, $-2.22 \pm 0.23$ ( $p < 0.002$ ) | 0.69           |
| Arginine                         | $y = a + bx$      | a, $91.10 \pm 1.21$ ( $p < 0.001$ ) | b, $-1.39 \pm 0.14$ ( $p < 0.001$ ) | 0.70           |
| Aspartic Acid                    | $y = a + bx$      | a, $81.91 \pm 1.73$ ( $p < 0.001$ ) | b, $-1.59 \pm 0.20$ ( $p < 0.001$ ) | 0.60           |
| Cystine                          | $y = a + bx$      | a, $64.49 \pm 2.76$ ( $p < 0.001$ ) | b, $-2.31 \pm 0.32$ ( $p < 0.001$ ) | 0.55           |
| Glutamic Acid                    | $y = a + bx$      | a, $88.32 \pm 1.45$ ( $p < 0.001$ ) | b, $-1.52 \pm 0.17$ ( $p < 0.001$ ) | 0.66           |
| Glycine                          | $y = a + bx$      | a, $79.62 \pm 1.91$ ( $p < 0.001$ ) | b, $-1.85 \pm 0.22$ ( $p < 0.001$ ) | 0.62           |
| Histidine                        | $y = a + bx$      | a, $85.58 \pm 1.61$ ( $p < 0.001$ ) | b, $-1.75 \pm 0.19$ ( $p < 0.001$ ) | 0.68           |
| Isoleucine                       | $y = a + bx$      | a, $87.91 \pm 1.88$ ( $p < 0.001$ ) | b, $-2.34 \pm 0.22$ ( $p < 0.001$ ) | 0.73           |
| Leucine                          | $y = a + bx$      | a, $89.27 \pm 2.03$ ( $p < 0.001$ ) | b, $-2.56 \pm 0.24$ ( $p < 0.001$ ) | 0.74           |
| Lysine                           | $y = a + bx$      | a, $87.18 \pm 1.71$ ( $p < 0.001$ ) | b, $-1.62 \pm 0.20$ ( $p < 0.001$ ) | 0.61           |
| Methionine                       | $y = a + bx$      | a, $89.08 \pm 2.07$ ( $p < 0.001$ ) | b, $-2.36 \pm 0.24$ ( $p < 0.001$ ) | 0.70           |
| Methionine + Cystine             | $y = a + bx$      | a, $76.31 \pm 2.31$ ( $p < 0.001$ ) | b, $-2.36 \pm 0.27$ ( $p < 0.001$ ) | 0.65           |
| Phenylalanine                    | $y = a + bx$      | a, $90.40 \pm 1.69$ ( $p < 0.001$ ) | b, $-2.12 \pm 0.20$ ( $p < 0.001$ ) | 0.74           |
| Proline                          | $y = a + bx$      | a, $81.63 \pm 1.86$ ( $p < 0.001$ ) | b, $-1.97 \pm 0.22$ ( $p < 0.001$ ) | 0.66           |
| Serine                           | $y = a + bx$      | a, $84.60 \pm 1.80$ ( $p < 0.001$ ) | b, $-2.08 \pm 0.21$ ( $p < 0.001$ ) | 0.70           |
| Threonine                        | $y = a + bx$      | a, $79.85 \pm 1.92$ ( $p < 0.001$ ) | b, $-1.96 \pm 0.22$ ( $p < 0.001$ ) | 0.65           |
| Tryptophan                       | $y = a + bx$      | a, $81.52 \pm 1.84$ ( $p < 0.001$ ) | b, $-1.92 \pm 0.21$ ( $p < 0.001$ ) | 0.66           |
| Valine                           | $y = a + bx$      | a, $86.11 \pm 1.93$ ( $p < 0.001$ ) | b, $-2.23 \pm 0.22$ ( $p < 0.001$ ) | 0.70           |

561

**Figures**

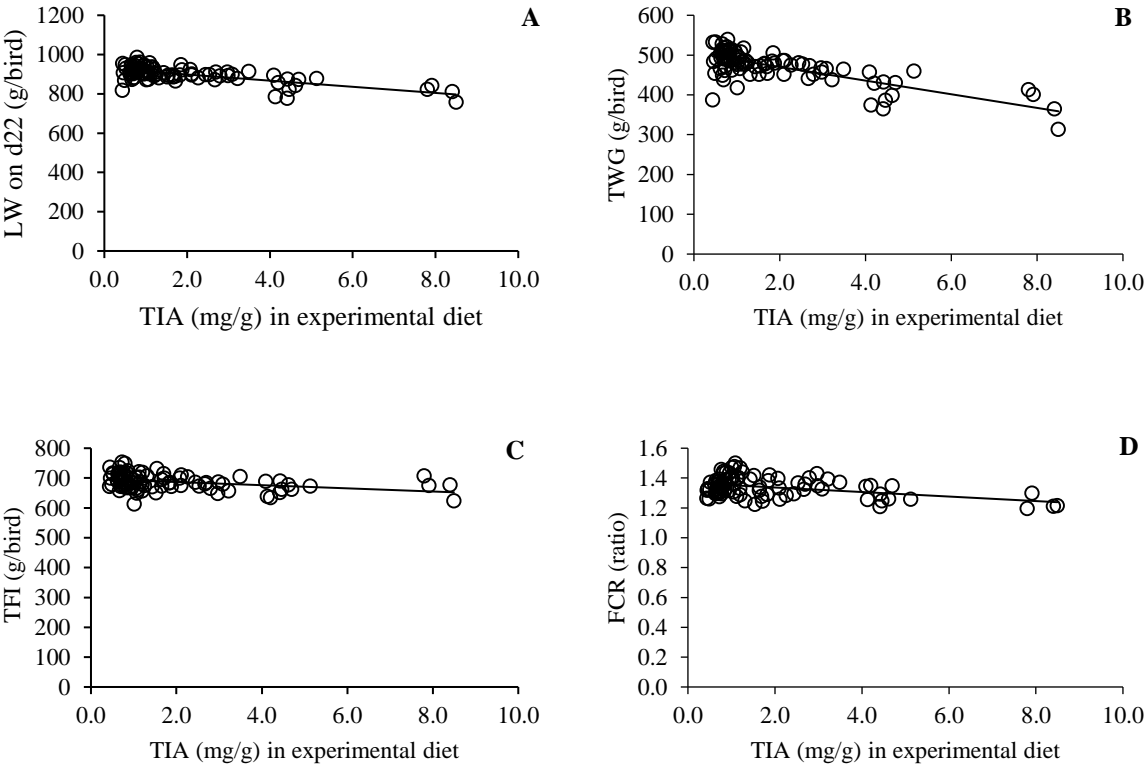

Figure 1: Effect of trypsin inhibitor activity (TIA) in mg/g in experimental diets on Live weight (LW) on d22 in g/bird (A), Total weight gain (TWG) in g/bird (B), total feed intake (TFI) in g/bird (C) and feed conversion ratio (FCR) as the ratio of consumed feed and live weight (D).

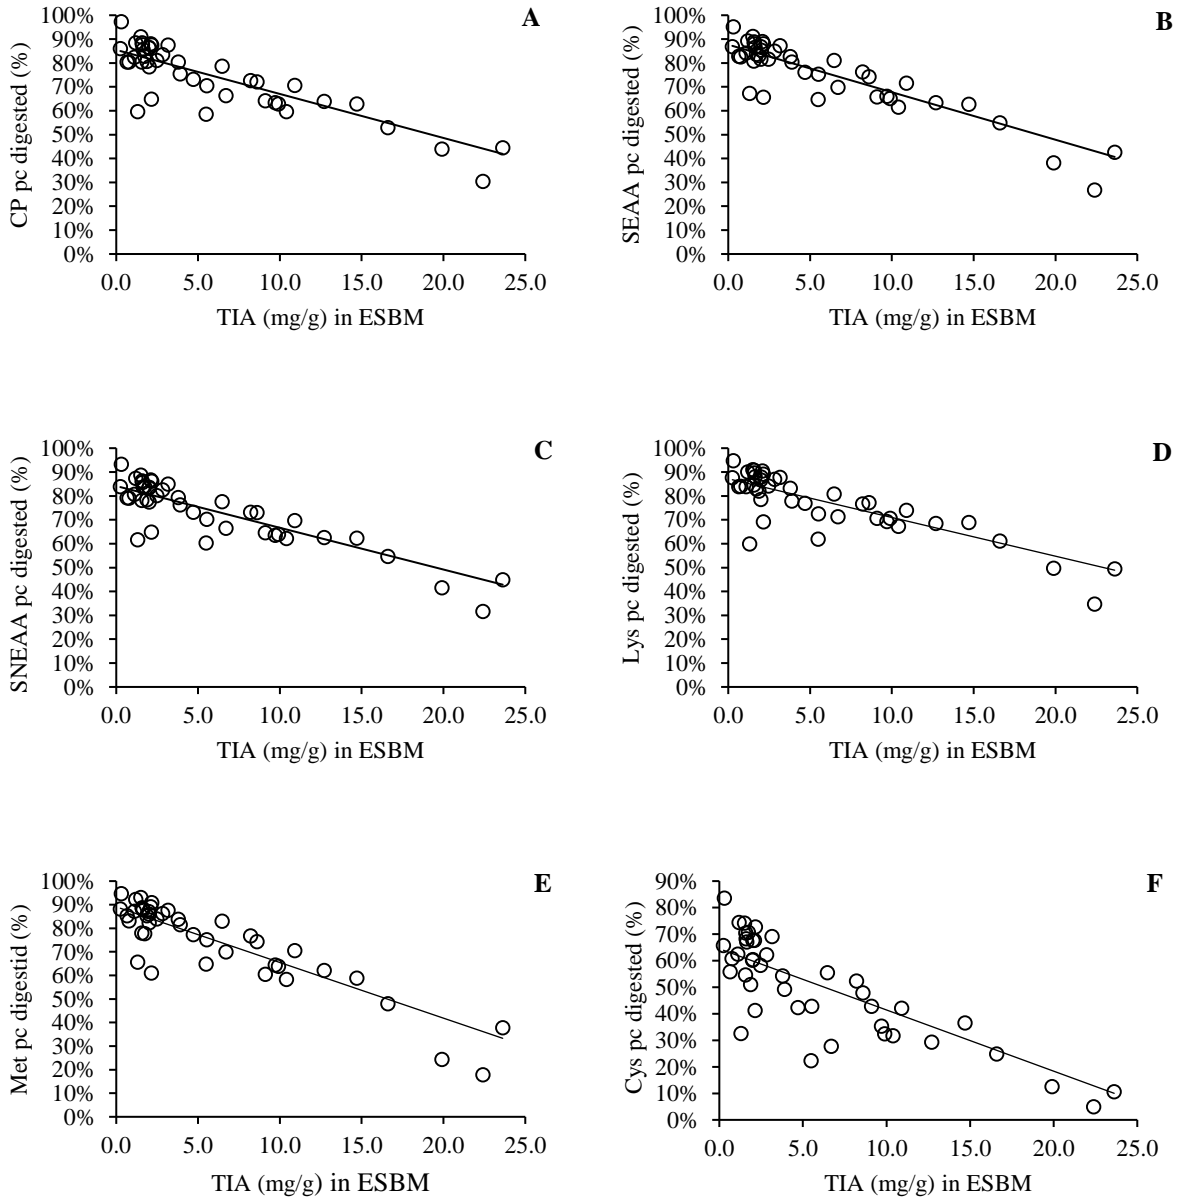

Figure 2: Effect of trypsin inhibitor activity (TIA) in mg/g on percentage of prececal (pc) digested crude protein (CP) (A), sum of essential amino acids (SEAA) (B), sum of non-essential amino acids (SNEAA) (C), lysine (Lys) (D), methionine (Met) (E) and cystine (Cys) (F) of expeller extracted soybean meal (ESBM).

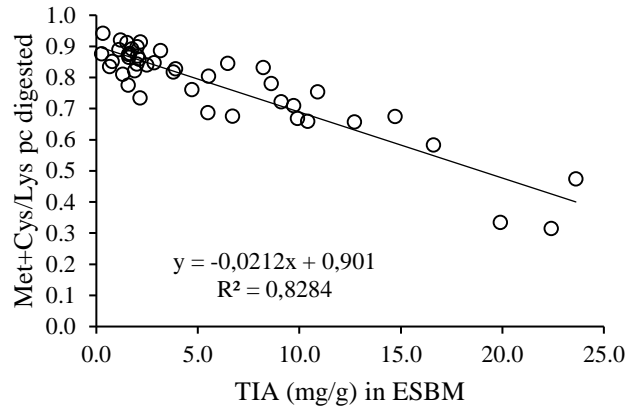

Figure 3: Effect of trypsin inhibitor activity (TIA) in mg/g on the ratio of prececal (pc) digested methionine + cysteine (Met + Cys) and lysine in expeller extracted soybean meal (ESBM).
